# Supplementary material for: The potential for vaccination-induced herd immunity against the SARS-CoV-2 B.1.1.7 variant
Source: PubMed Central journal article supplement (PMC8138959; doi:10.2807/1560-7917.es.2021.26.20.2100428), 2021-05-20
Supplement: 2100428_Supplement.pdf [file 2100428_Supplement.pdf]

1 This supplementary material is hosted by Eurosurveillance as supporting information alongside the  
2 article "*The potential for vaccination-induced herd immunity against SARS-CoV-2 B.1.1.7 variant*" on  
3 behalf of the authors who remain responsible for the accuracy and appropriateness of the  
4 content. The same standards for ethics, copyright, attributions and permissions as for the article  
5 apply. Supplements are not edited by Eurosurveillance and the journal is not responsible for the  
6 maintenance of any links or email addresses provided therein.

7

8

## 9 **Methods**

### 10 *Formula for required vaccine coverage*

11

12 We defined the required coverage for herd immunity,  $C$ , as follows:

13

$$14 \quad C = [(1 - 1/R_0) - p]/[(1-p) * V_e],$$

15

16 where  $R_0$  is for SARS-CoV-2,  $p$  is the proportional reduction in transmission (due to previous  
17 infection), and  $V_e$  is the vaccine effectiveness. If  $R_0$  is calculated using an age-structured  
18 next generation matrix and vaccination scales susceptibility across this matrix, the herd  
19 immunity threshold will still be  $1-1/R_0$ .

20

### 21 *Source of vaccine effectiveness estimates*

22

23 We obtained published estimates for the average and 95% upper and lower confidence  
24 intervals for vaccine effectiveness against measles<sup>1</sup>, mumps<sup>1</sup>, rubella<sup>1</sup>, varicella<sup>1</sup>, SARS-  
25 CoV-2<sup>2</sup>, influenza A/H1N1 (post-2009), A/H3N2, and B<sup>3</sup>. For SARS-CoV-2, we used data  
26 from a study estimating vaccine effectiveness in reducing infection among antibody negative  
27 healthcare workers who received two doses of BNT162b2<sup>4</sup> (effectiveness was estimated at  
28 86% (95% CI: 76-97%). This compares with an estimate of 83% (76-87%) lower risk of  
29 reinfection among healthcare workers following prior infection<sup>5</sup>. A recent analysis of UK  
30 community infection data<sup>6</sup> also estimated a 64% (95% CI: 55–70%) reduction in risk of  
31 infection following one dose of ChAdOx1 nCoV-19, and a 45% (33–54%) reduction in risk of  
32 transmission if infected after ChAdOx1 nCoV-19 vaccination<sup>7</sup>, which would imply a potential  
33 reduction in transmission of around 70–85% post-vaccination, because  $P(\text{transmit} |$   
34  $\text{exposed}) = P(\text{transmit} | \text{infected}) \times P(\text{infected} | \text{exposed})$ . In order to reflect uncertainty in  
35 estimates, we generated a set of Monte Carlo samples for each pathogen by fitting the  
36 average and upper/lower confidence intervals to a beta distribution and sampling 1,000  
37 values.

38

### 39 *Source of pathogen $R_0$ estimates*

40

41 For mumps, rubella, and varicella, we obtained a set of 1,000 samples by bootstrapping a  
42 set of pre-vaccination  $R_0$  estimates from various regions<sup>8,9</sup>. For measles, SARS-CoV-2  
43 variants, and influenza subtypes, we obtained estimates of the average, upper confidence  
44 interval and lower confidence interval for each to a lognormal distribution in order to sample

45 1,000 values<sup>10–13</sup>. We assumed that transmissibility of SARS-CoV-2 B.1.1.7 was 67% higher  
46 than for pre-B.1.1.7 variants<sup>11</sup>.

47

48 *Source of age distribution data*

49

50 Data on the country-specific proportion of the total population aged 0–14 years, and the  
51 income bracket of each country in 2020, was taken from The World Bank<sup>14</sup>.

52

53 *Source of sero-prevalence estimates*

54

55 Seroprevalence studies were obtained from SeroTracker, a dashboard that synthesises  
56 findings from hundreds of global SARS-CoV-2 serological studies<sup>15</sup>. We aimed to estimate  
57 the seroprevalence in the general population for each study region. Therefore, in an attempt  
58 to reduce selection bias, we only considered prospective households/community studies.  
59 Each seroprevalence study provides information on study site country, sample size,  
60 geographical scope (national, region, local), and the time frame in which samples were  
61 collected. If multiple studies exist for a country within a geographical scope, we consider only  
62 the most recent estimate.

63 **Supplementary Tables**

64

| <b>Pathogen</b>              | <b>Vaccine effectiveness<br/>(%, mean, 95% CI)</b> | <b>Basic reproduction number<br/>(mean, 95% CI)</b> |
|------------------------------|----------------------------------------------------|-----------------------------------------------------|
| Measles                      | 96 (72–99)                                         | 12.0 (6.0–18.0)                                     |
| Mumps                        | 86 (65–92)                                         | 4.2 (3.6–4.5)                                       |
| Rubella                      | 89 (58–97)                                         | 4.7 (3.4–7.8)                                       |
| Varicella                    | 95 (92–97)                                         | 6.5 (3.3–16.9)                                      |
| SARS-CoV-2 (pre-B.1.1.7)     | 86 (76–97)                                         | 2.7 (1.5–3.8)                                       |
| SARS-CoV-2 (B.1.1.7)         | 86 (76–97)                                         | 4.5 (2.5–6.4)                                       |
| Influenza A/H1N1 (post-2009) | 61 (57–65)                                         | 1.4 (1.2–2.0)                                       |
| Influenza A/H3N2             | 33 (22–43)                                         | 2.1 (1.6–2.5)                                       |
| Influenza B                  | 54 (46–61)                                         | 2.1 (1.6–2.5)                                       |

65

66 **Supplementary Table 1:** Assumed values of vaccine effectiveness and basic reproduction  
67 number for different pathogens, based on empirical estimates.

68

69

70

71

72

73

74

75 **Supplementary Figures**

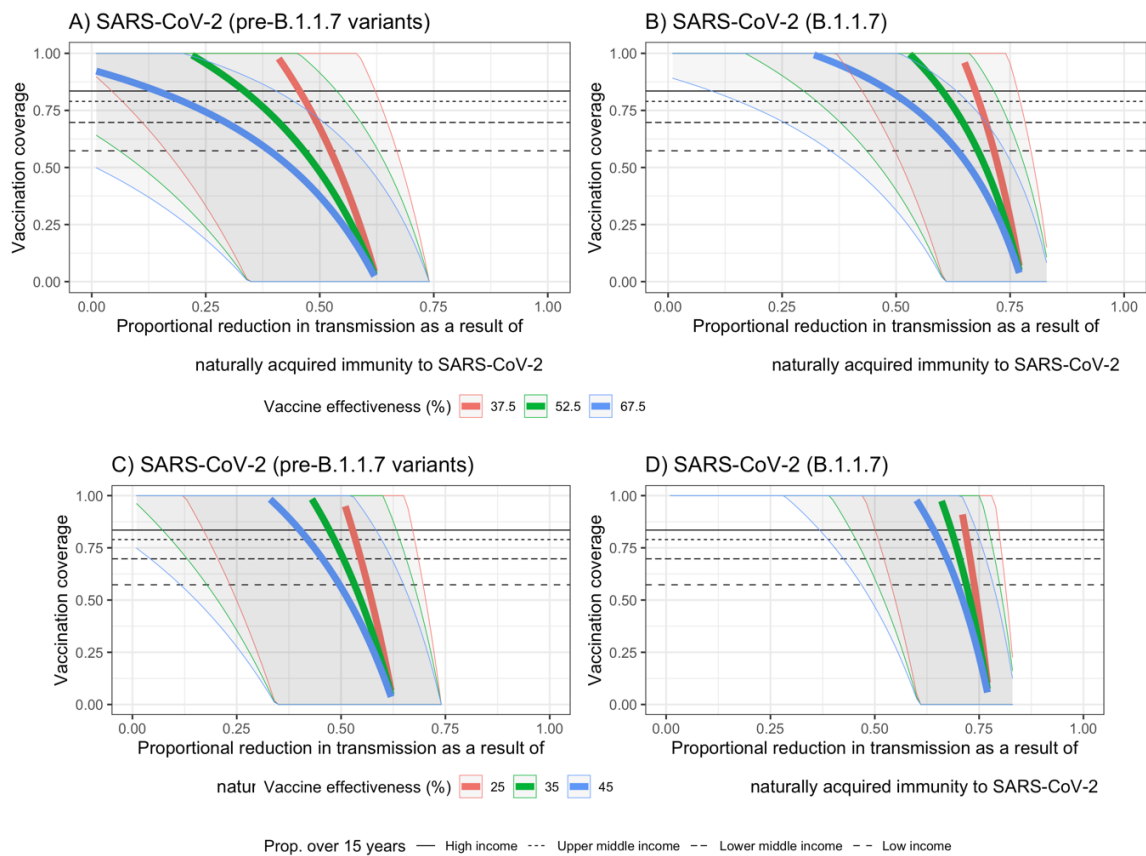

76

77 **Figure S1.** Vaccination coverage required to reach herd immunity for pre-B.1.1.7-like (A and  
 78 C) and B.1.1.7-like (B and D) transmission and different levels of vaccine effectiveness  
 79 assuming (in A and B) a reduction of 25% in vaccine effectiveness due to waning immunity,  
 80 and (in C and D) a reduction of 50% of vaccine effectiveness due to warning immunity  
 81 compared to vaccine effectiveness assumptions in **Figure 1b and 1c.**

82

83 **References**

- 84 1. Di Pietrantonj, C., Rivetti, A., Marchione, P., Debalini, M. G. & Demicheli, V. Vaccines  
85 for measles, mumps, rubella, and varicella in children. *Cochrane Database of*  
86 *Systematic Reviews* vol. 2020 (2020).
- 87 2. Weekes, M. *et al.* Single-dose BNT162b2 vaccine protects against asymptomatic  
88 SARS-CoV-2 infection. *Authorea Prepr.* (2021)  
89 doi:10.22541/AU.161420511.12987747/V1.
- 90 3. Belongia, E. A. *et al.* Variable influenza vaccine effectiveness by subtype: a  
91 systematic review and meta-analysis of test-negative design studies. *Lancet Infect.*  
92 *Dis.* **16**, 942–951 (2016).
- 93 4. Hall, V. J. *et al.* Effectiveness of BNT162b2 mRNA Vaccine Against Infection and  
94 COVID-19 Vaccine Coverage in Healthcare Workers in England, Multicentre  
95 Prospective Cohort Study (the SIREN Study). *SSRN Electron. J.* (2021)  
96 doi:10.2139/ssrn.3790399.
- 97 5. Hall, V. *et al.* Do antibody positive healthcare workers have lower SARS-CoV-2  
98 infection rates than antibody negative healthcare workers? Large multi-centre  
99 prospective cohort study (the SIREN study), England: June to November 2020.  
100 *medRxiv* (2021) doi:10.1101/2021.01.13.21249642.
- 101 6. Pritchard, E. *et al.* Impact of vaccination on SARS-CoV-2 cases in the community: a  
102 population-based study using the UK's COVID-19 Infection Survey. *medRxiv*  
103 2021.04.22.21255913 (2021) doi:10.1101/2021.04.22.21255913.
- 104 7. PHE. One dose of COVID-19 vaccine can cut household transmission by up to half.  
105 *Press Release* [https://www.gov.uk/government/news/one-dose-of-covid-19-vaccine-](https://www.gov.uk/government/news/one-dose-of-covid-19-vaccine-can-cut-household-transmission-by-up-to-half)  
106 [can-cut-household-transmission-by-up-to-half](https://www.gov.uk/government/news/one-dose-of-covid-19-vaccine-can-cut-household-transmission-by-up-to-half) (2021).
- 107 8. Edmunds, W. J., Gay, N. J., Kretzschmar, M., Pebody, R. G. & Wachmann, H. The  
108 pre-vaccination epidemiology of measles, mumps and rubella in Europe: Implications  
109 for modelling studies. *Epidemiol. Infect.* **125**, 635–650 (2000).
- 110 9. Nardone, A. *et al.* The comparative sero-epidemiology of varicella zoster virus in 11  
111 countries in the European region. *Vaccine* **25**, 7866–7872 (2007).
- 112 10. Guerra, F. M. *et al.* The basic reproduction number (R0) of measles: a systematic  
113 review. *The Lancet Infectious Diseases* vol. 17 e420–e428 (2017).
- 114 11. Davies, N. G. *et al.* Estimated transmissibility and impact of SARS-CoV-2 lineage  
115 B.1.1.7 in England. *Science* (2021) doi:10.1126/science.abg3055.
- 116 12. Fraser, C. *et al.* Pandemic potential of a strain of influenza A (H1N1): Early findings.  
117 *Science (80-. )*. **324**, 1557–1561 (2009).
- 118 13. Biggerstaff, M., Cauchemez, S., Reed, C., Gambhir, M. & Finelli, L. Estimates of the  
119 reproduction number for seasonal, pandemic, and zoonotic influenza: A systematic

120 review of the literature. *BMC Infect. Dis.* **14**, 480 (2014).

121 14. Population ages 0-14 (% of total population) | Data.

122 <https://data.worldbank.org/indicator/SP.POP.0014.TO.ZS>.

123 15. Arora, R. K. *et al.* SeroTracker: a global SARS-CoV-2 seroprevalence dashboard. *The*

124 *Lancet Infectious Diseases* vol. 21 e75 (2020).

125

126
